# Supplementary material
Source: PubMed Central journal article supplement (PMC10119686)

AENQIAEFM dot-product=0.9 (r=0.9 P-value=0)

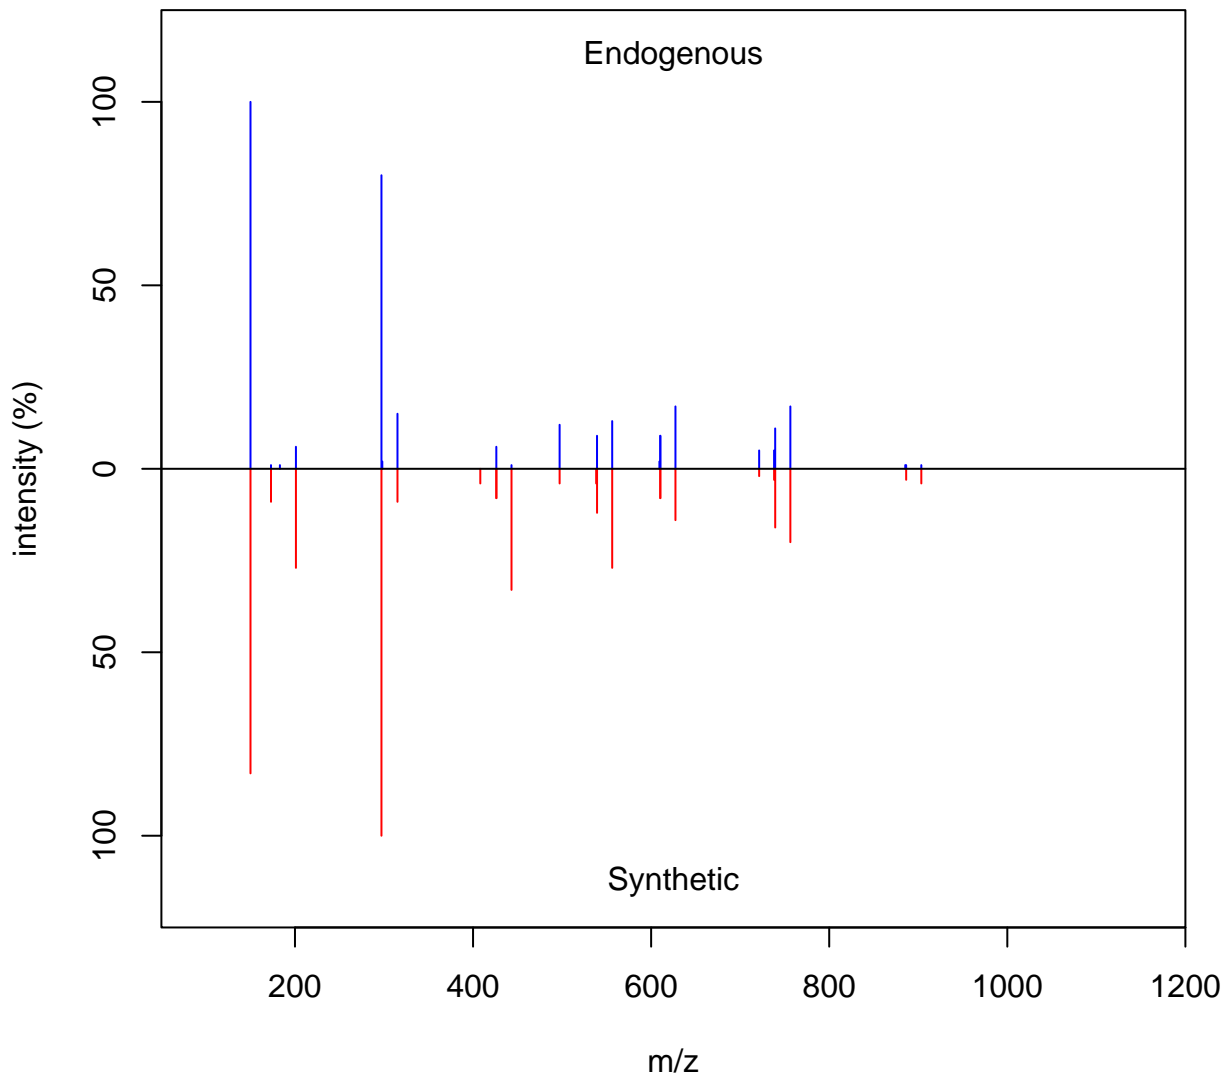

ALWDIETGQQSL dot-product=0.9 (r=0.9 P-value=0.0048)

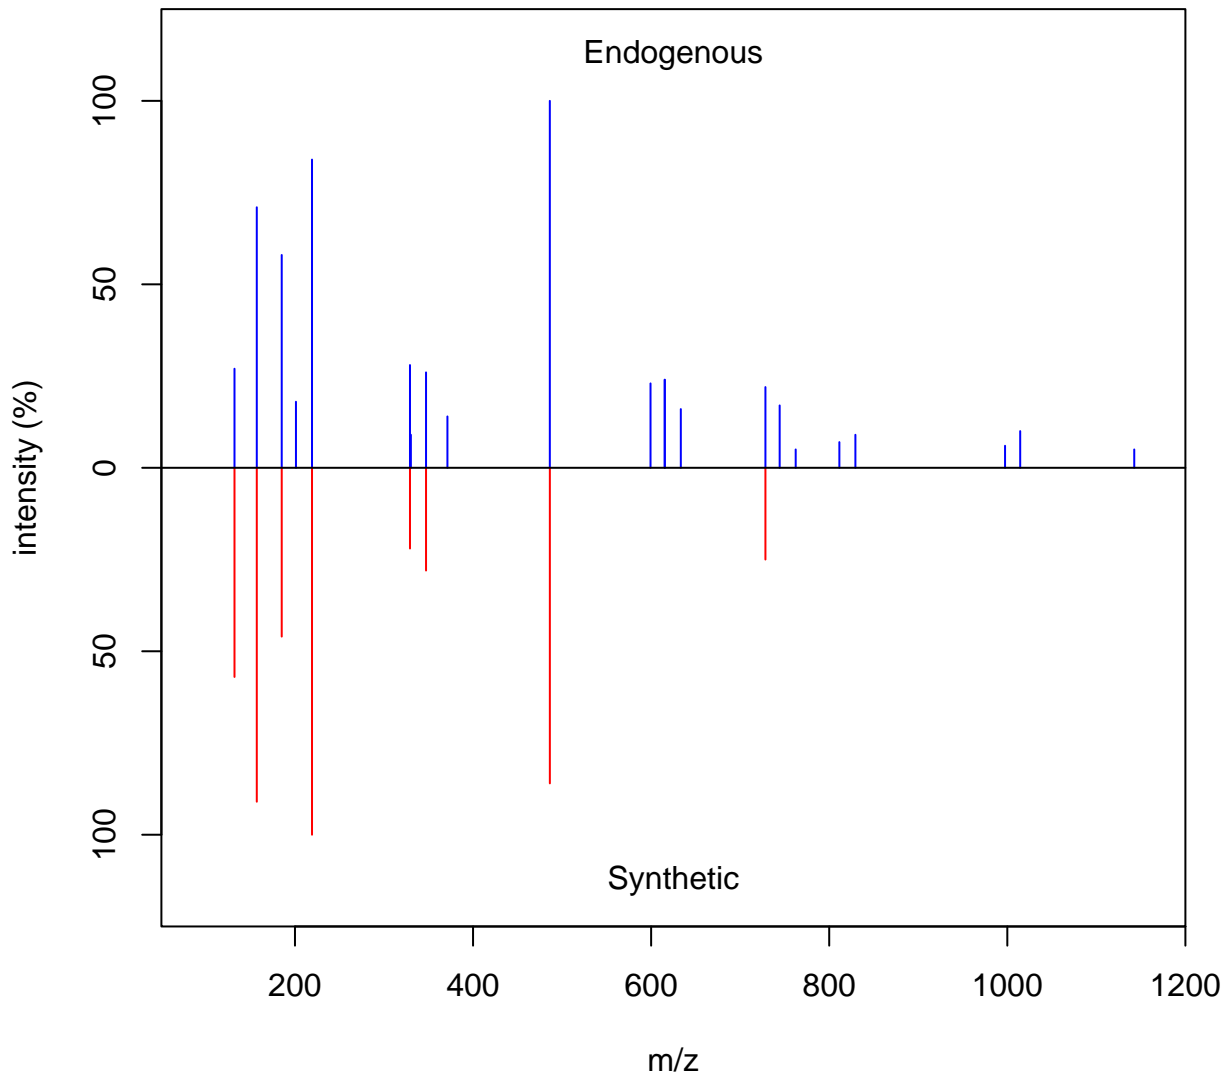

AMGVNLTTL dot-product=1 (r=0.9 P-value=0)

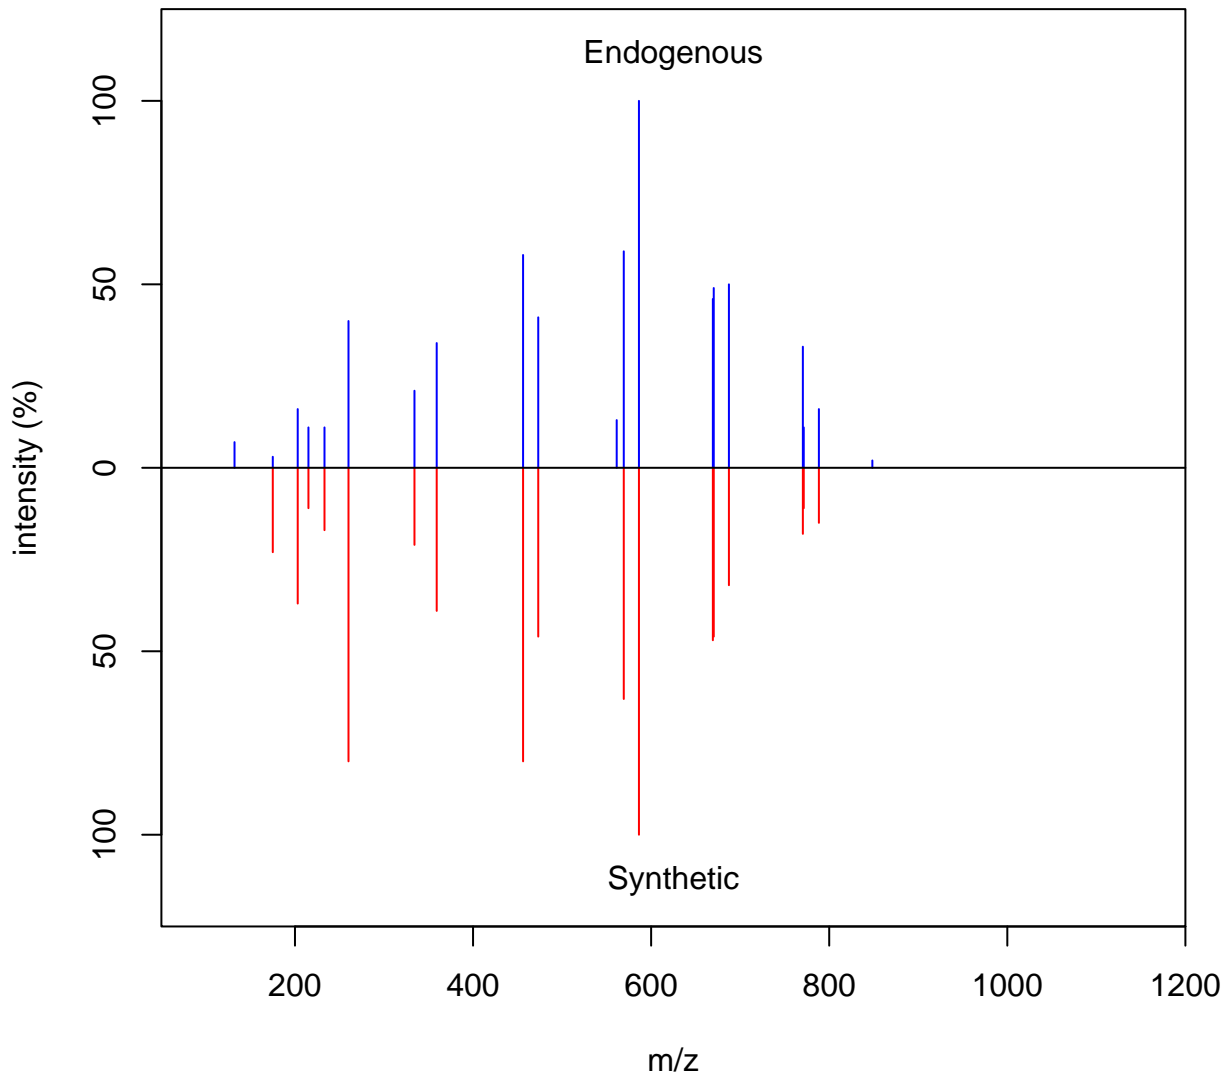

ATEKEASONLY dot-product=1 (r=1 P-value=0)

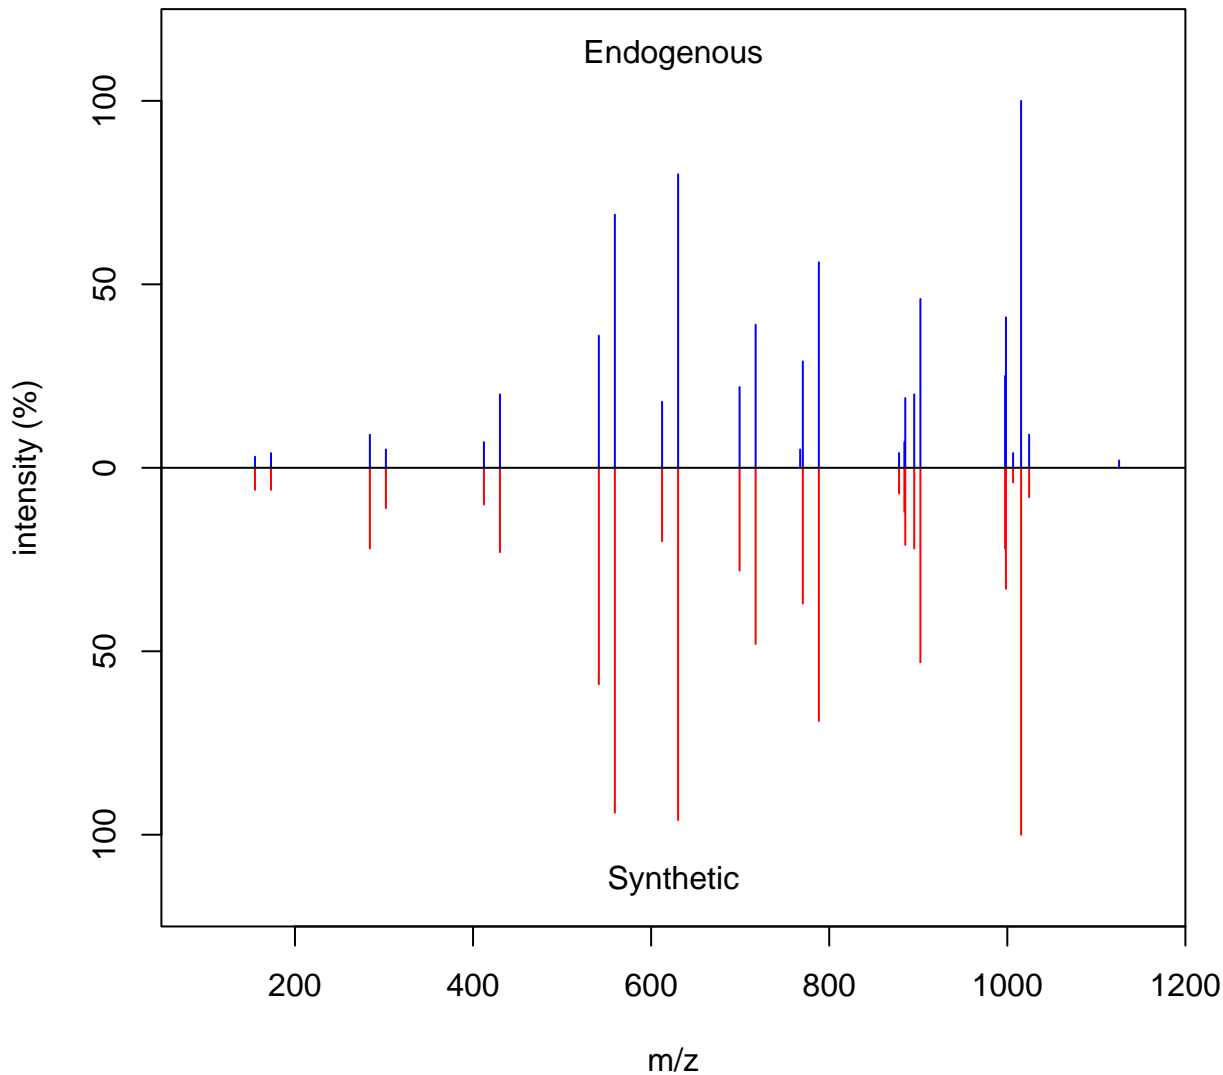

DLSDSATEV dot-product=0.9 (r=0.7 P-value=0.0023)

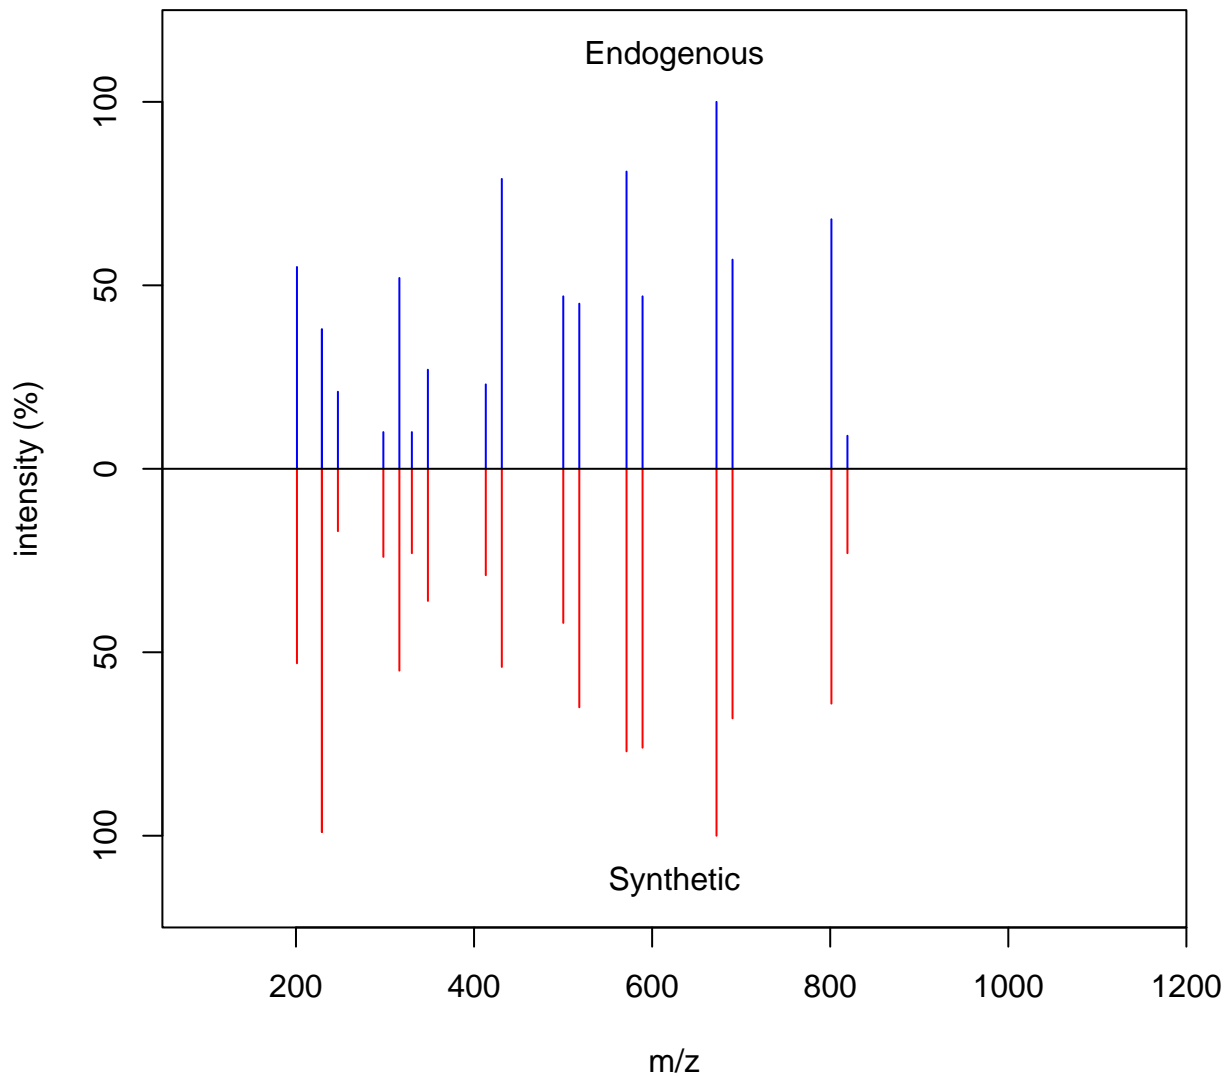

EENASRNLEY dot-product=1 (r=1 P-value=0)

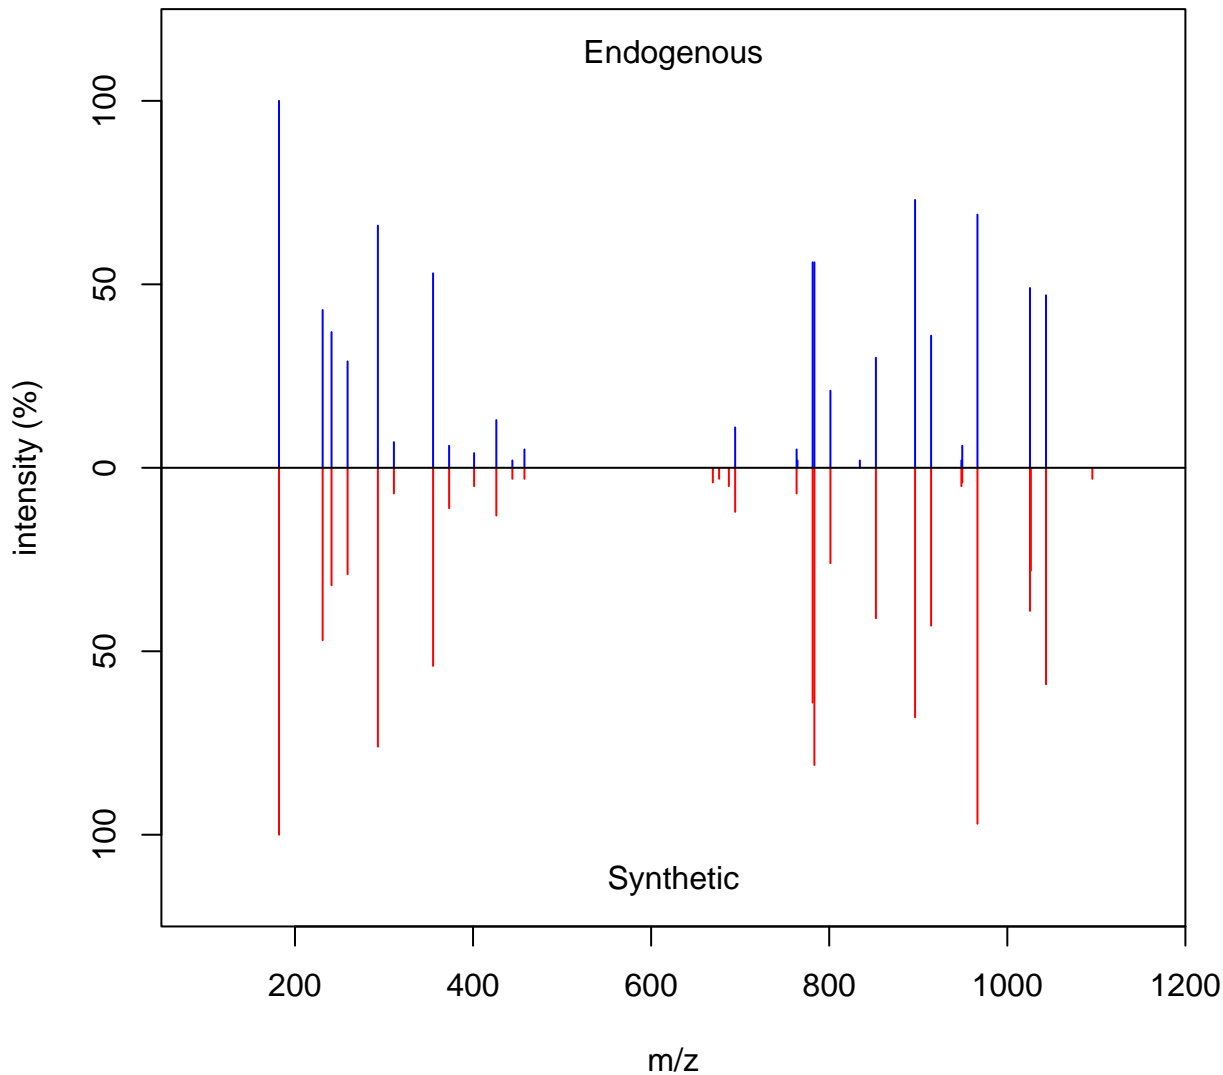

ESLPVSGNLIDLY dot-product=0.9 (r=0.8 P-value=0)

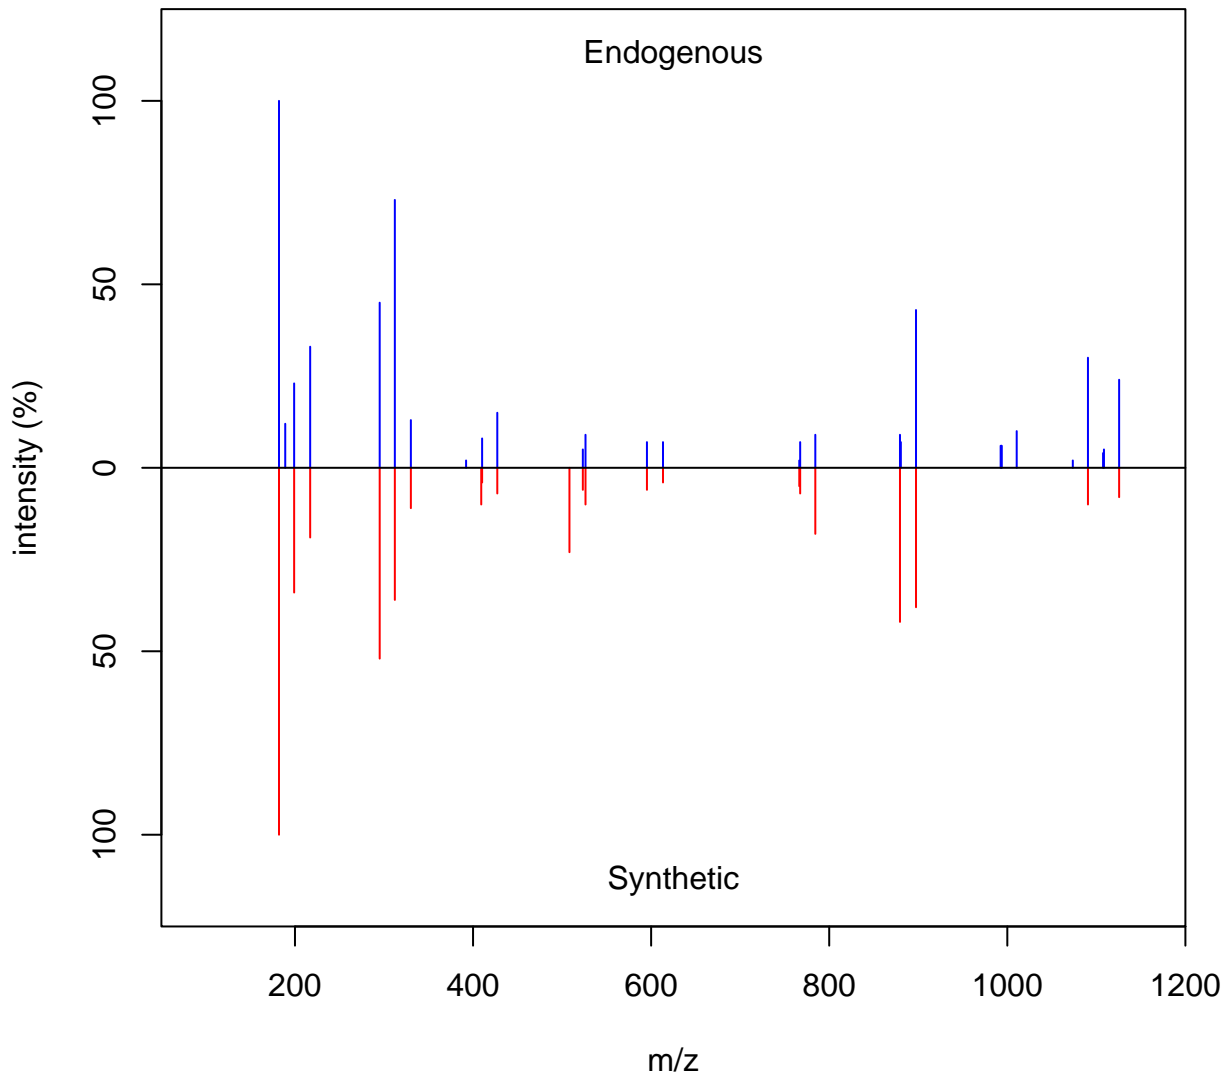

LARELLEKL dot-product=1 (r=1 P-value=0)

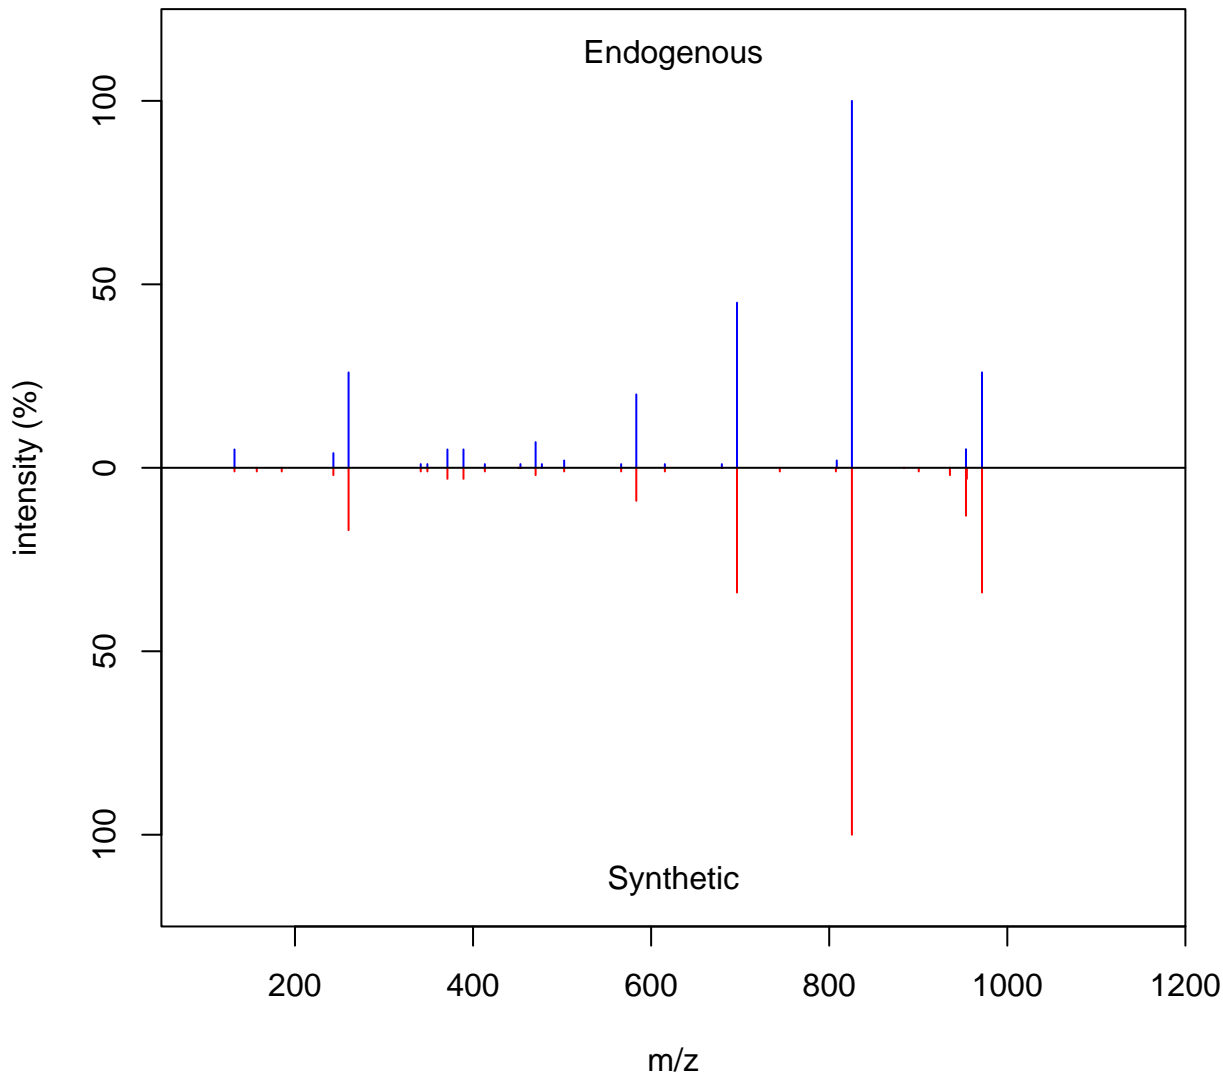



LASDHHLYL dot-product=0.9 (r=0.9 P-value=0)

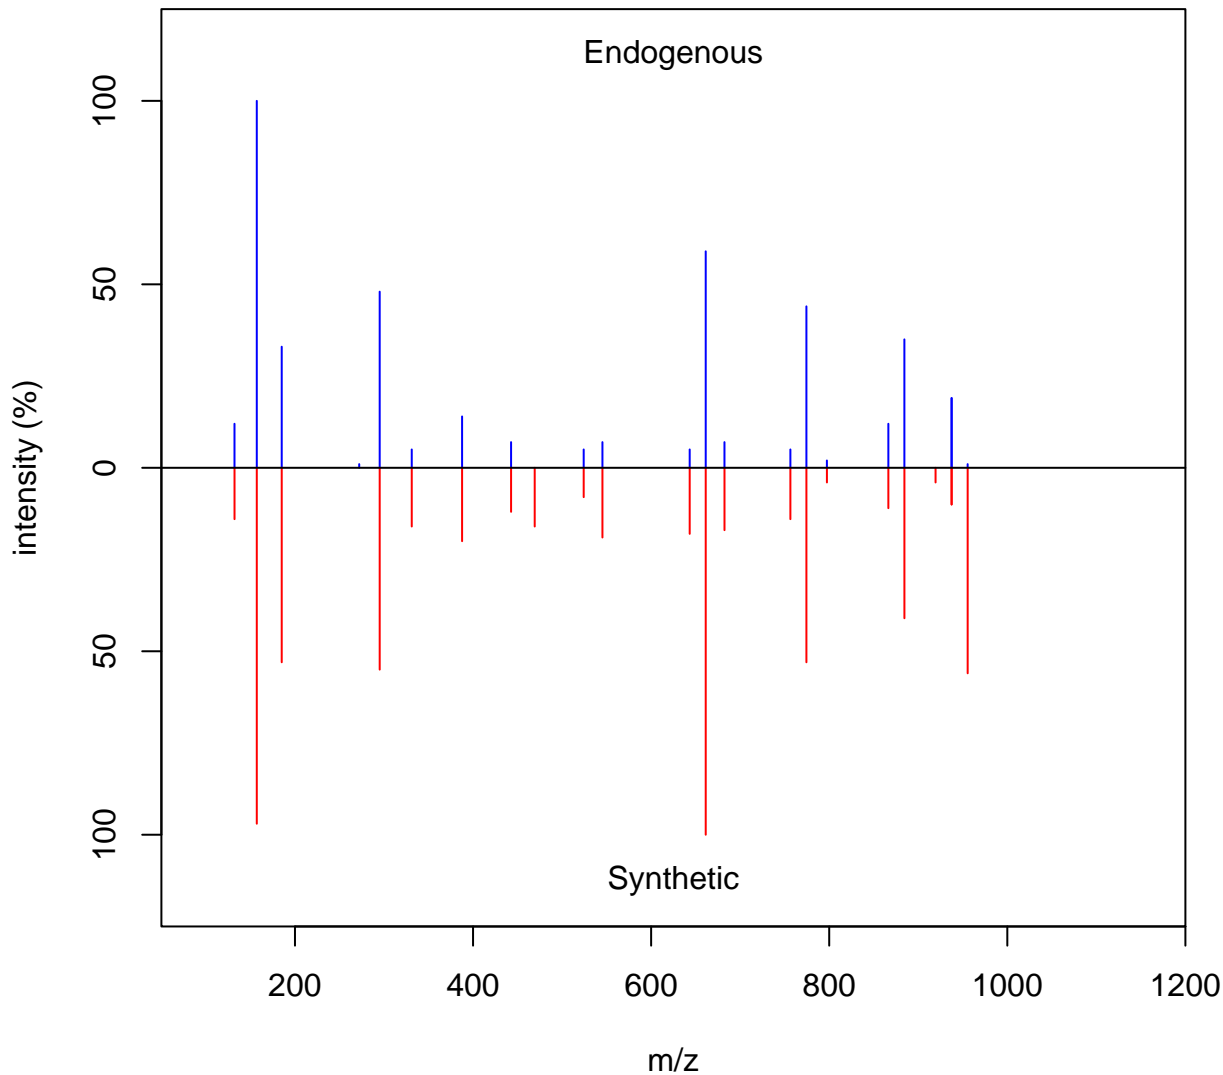

LIKEPVLLL dot-product=0.9 (r=0.9 P-value=2e-04)

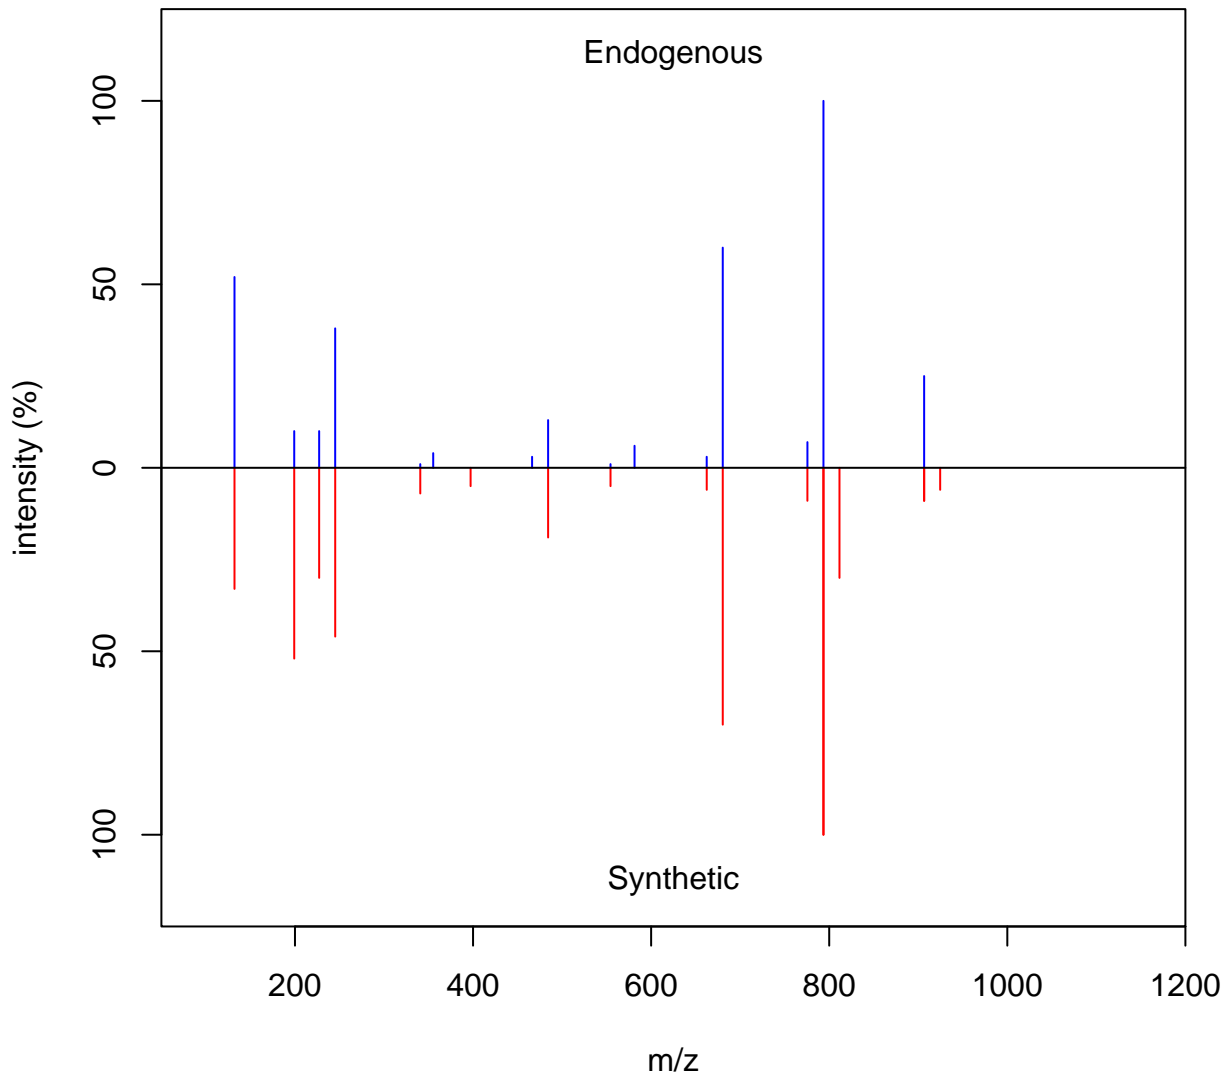

LLLDKLLSV dot-product=0.8 (r=0.6 P-value=0.0106)

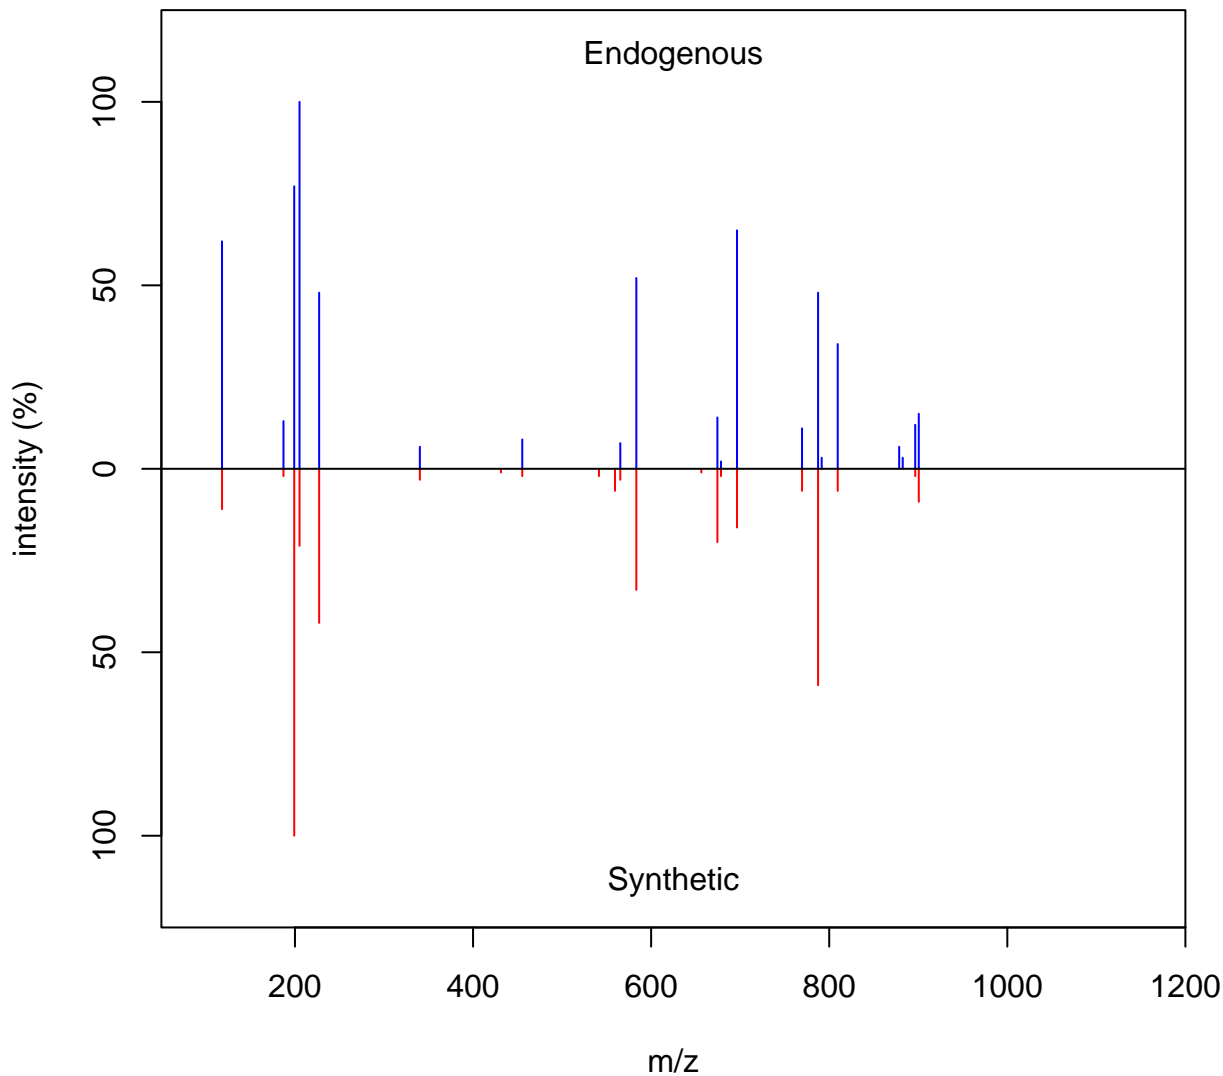

NSIVTNEQI dot-product=1 (r=0.9 P-value=0)

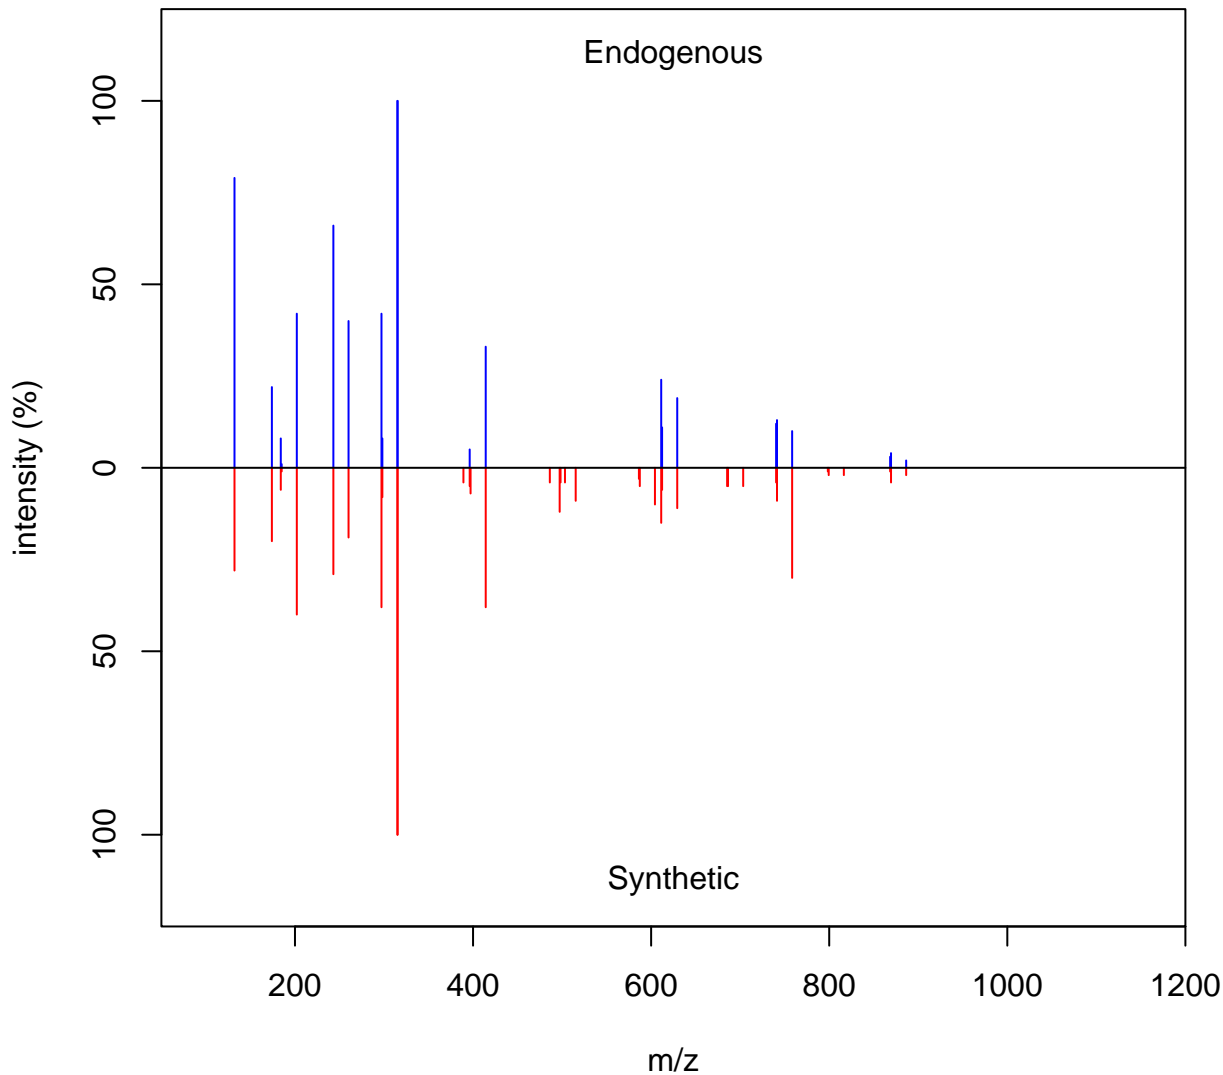

SFEGFSPEL dot-product=1 (r=1 P-value=0)

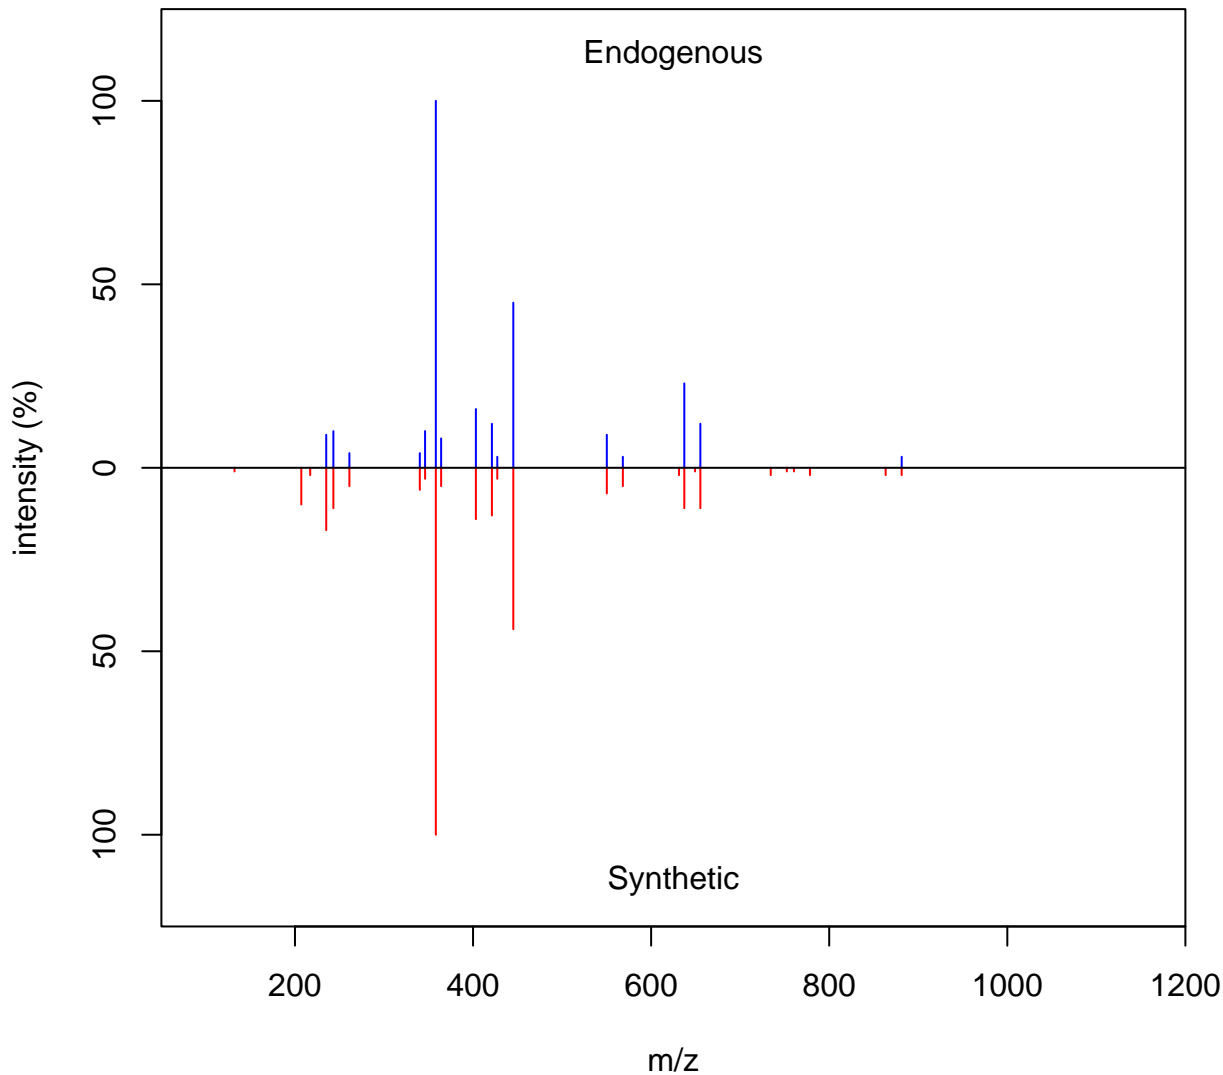

SGVSNYPELL dot-product=0.9 (r=0.9 P-value=0)

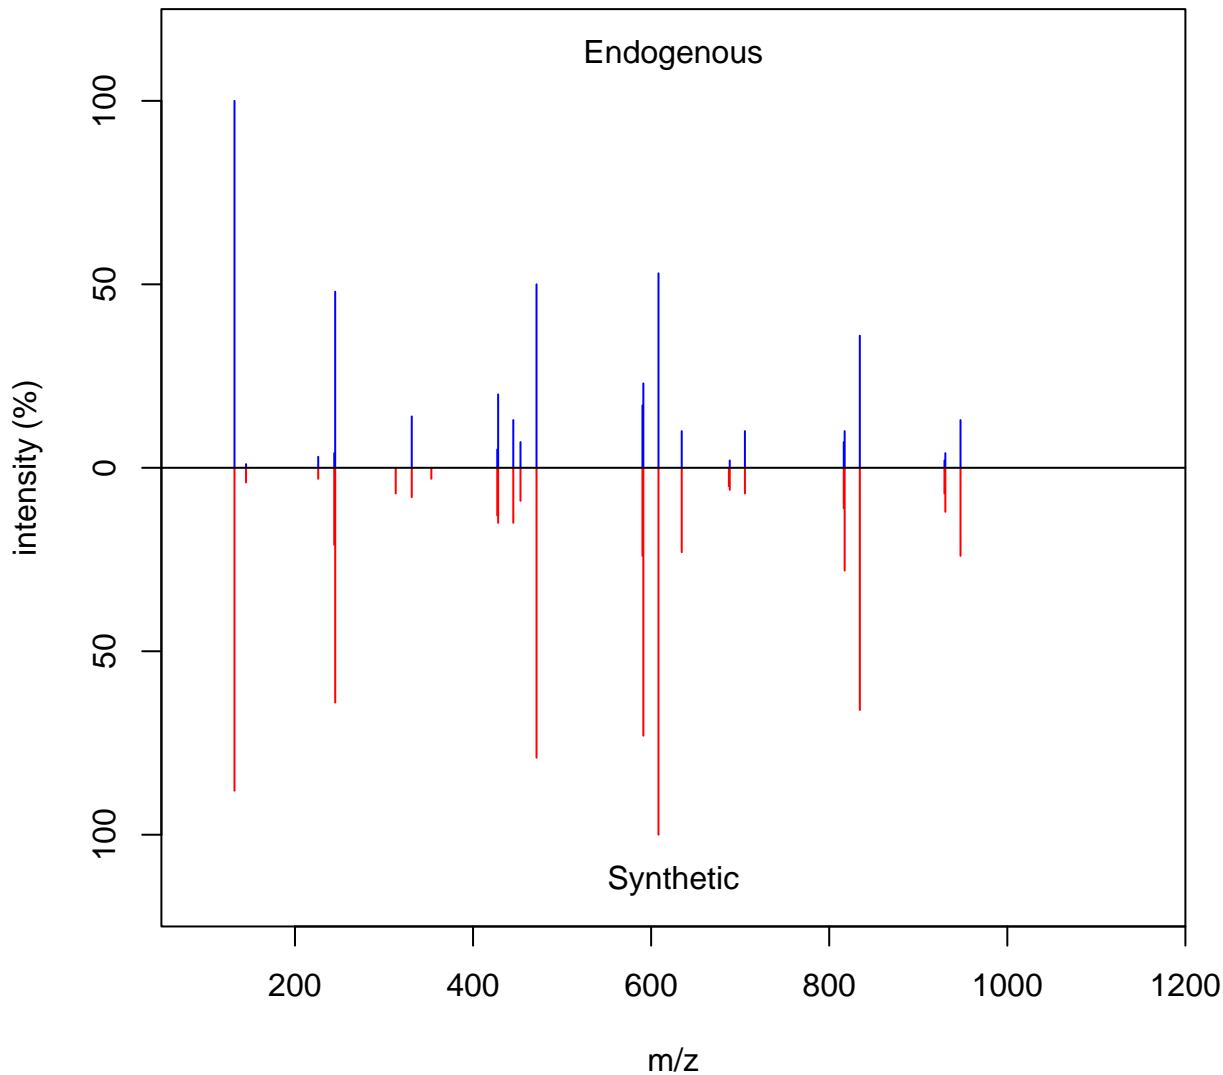

SPSAAIYNIDTSSSEATG dot-product=0.8 (r=0.9 P-value=0)

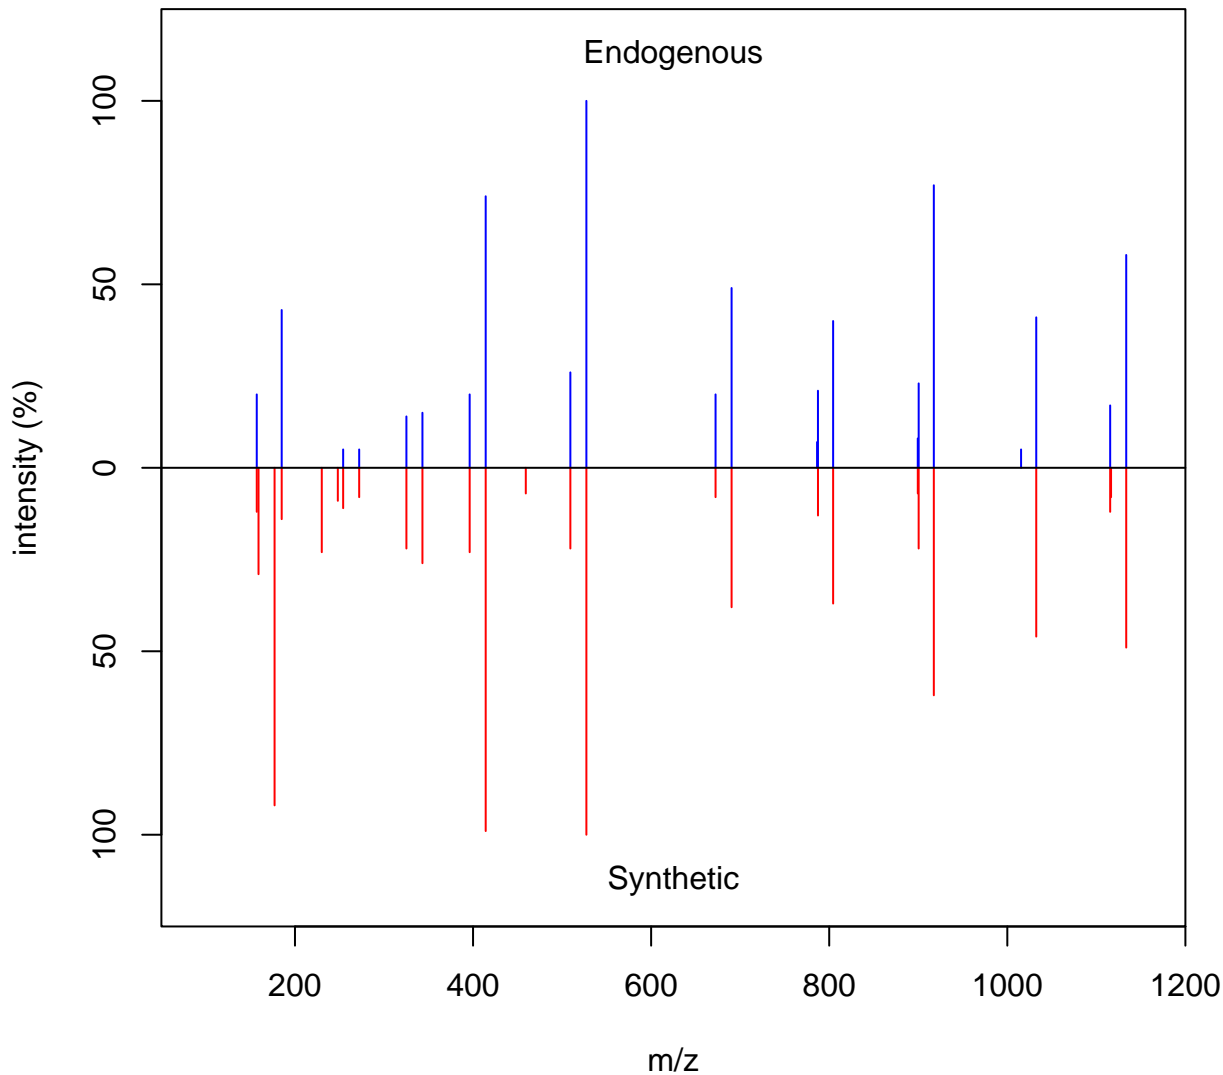

SSFQGGGSVTK dot-product=0.8 (r=0.8 P-value=0)

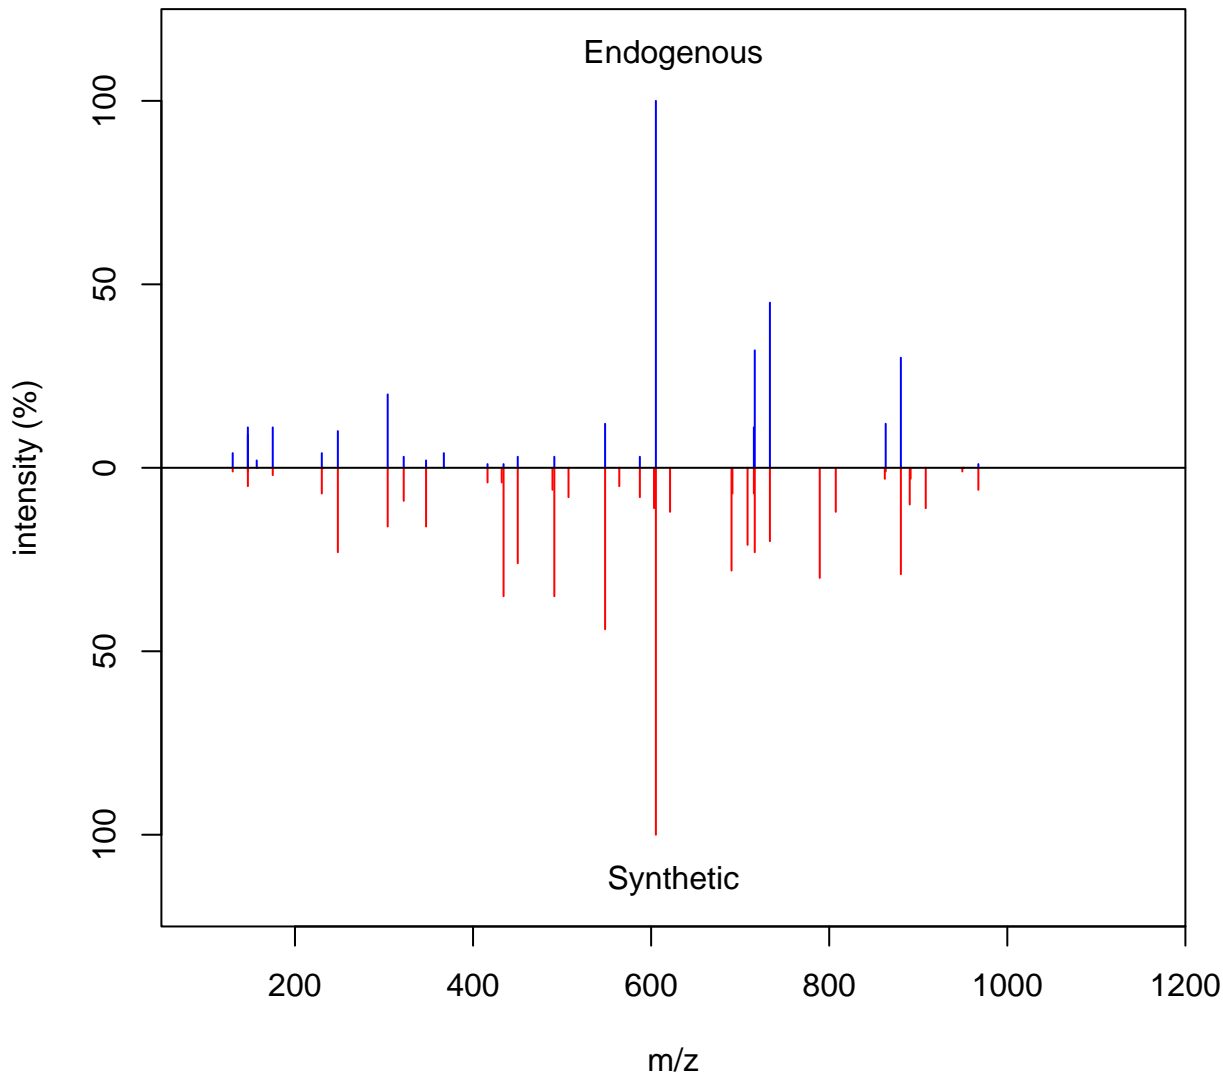



SVLLNVEHL dot-product=1 (r=0.9 P-value=0)

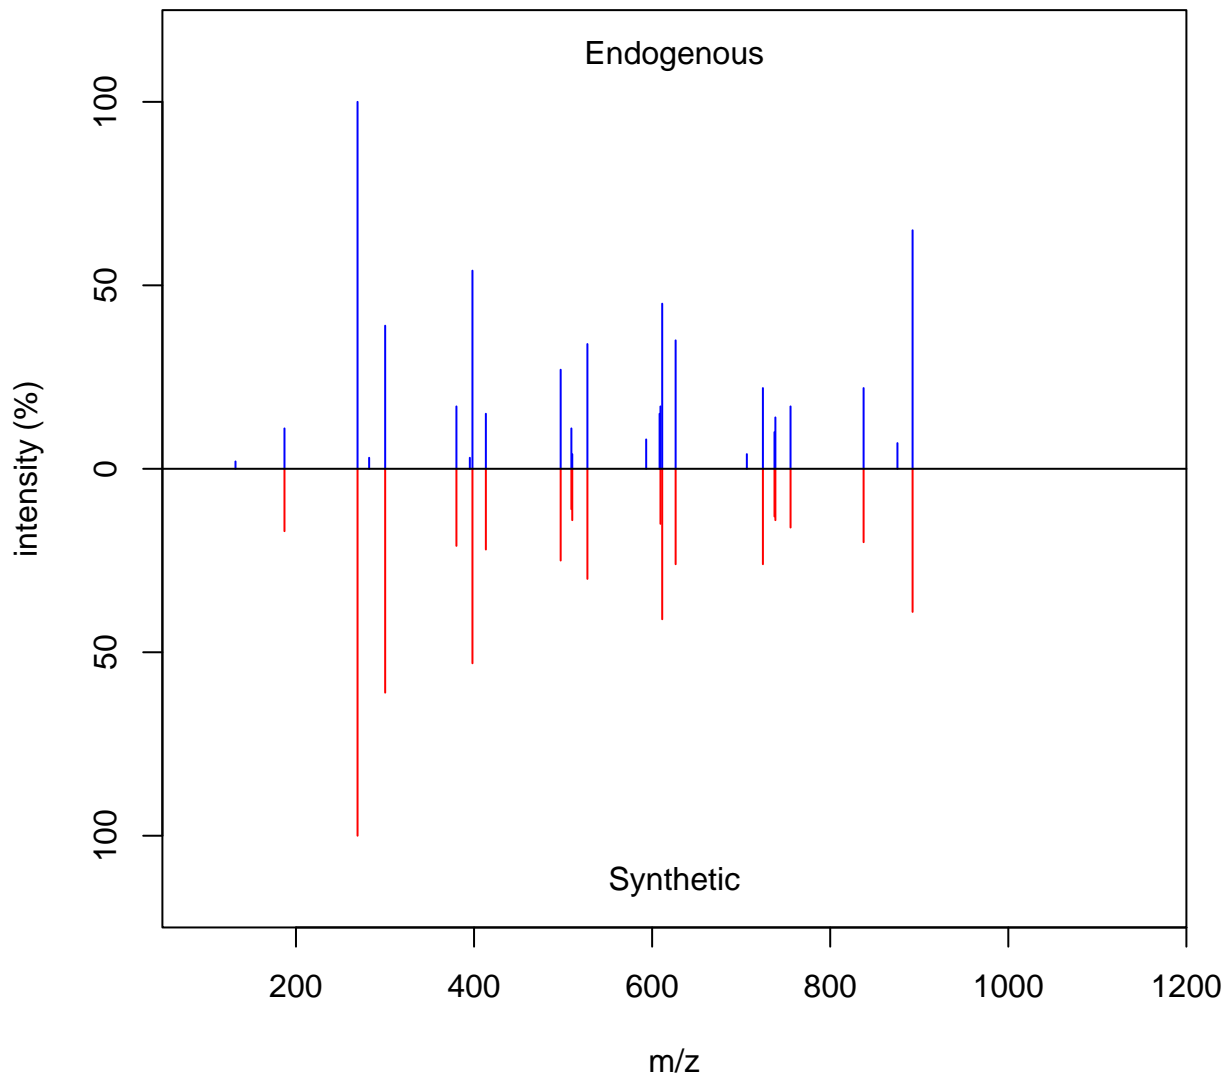

TGLVGADPI dot-product=1 (r=1 P-value=0)

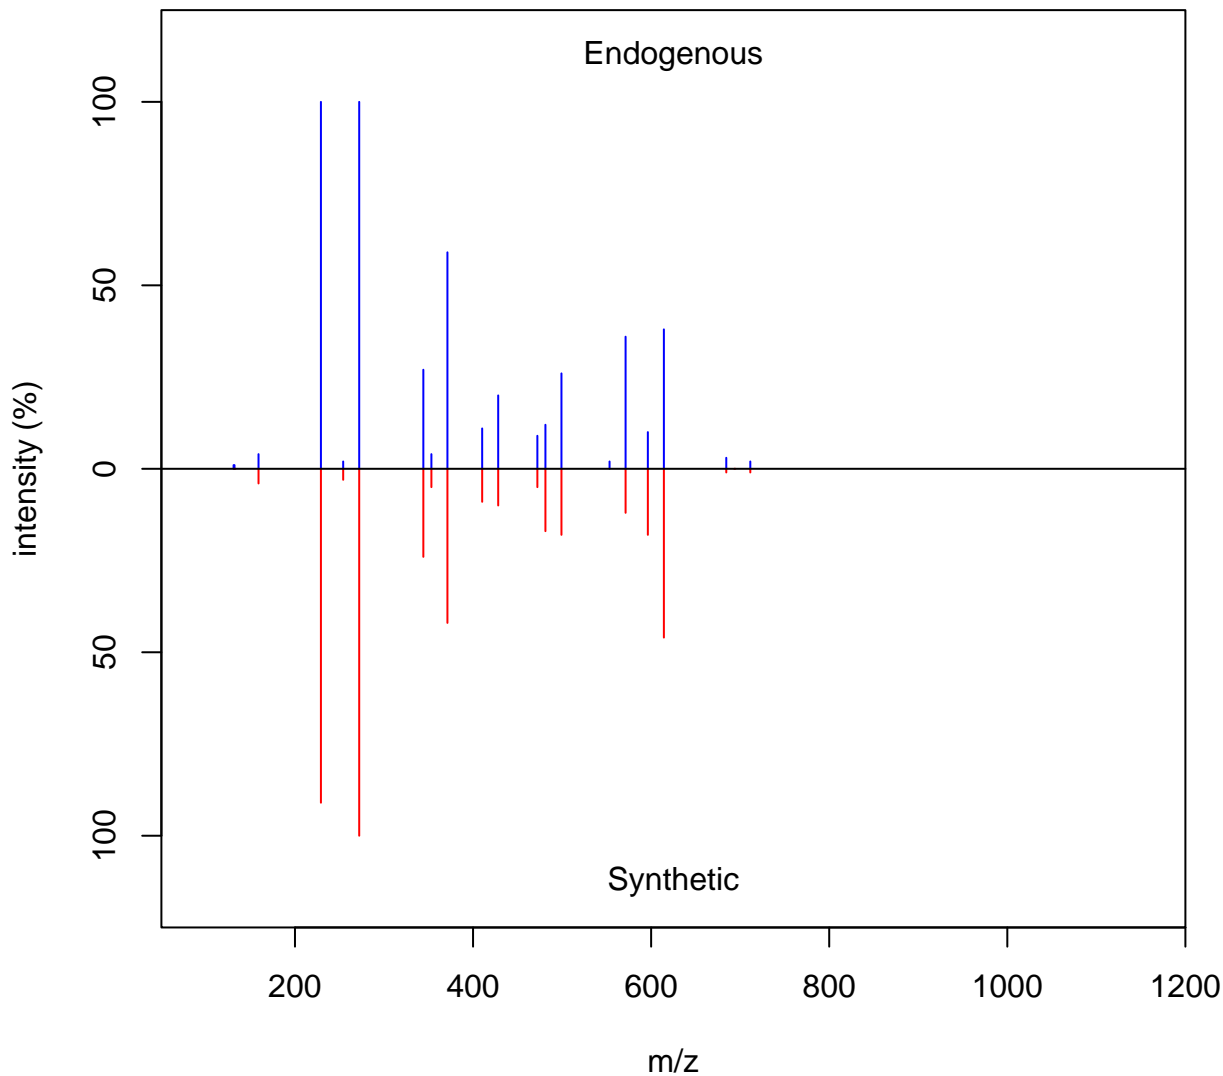

VADSSSPEV dot-product=1 (r=1 P-value=0)

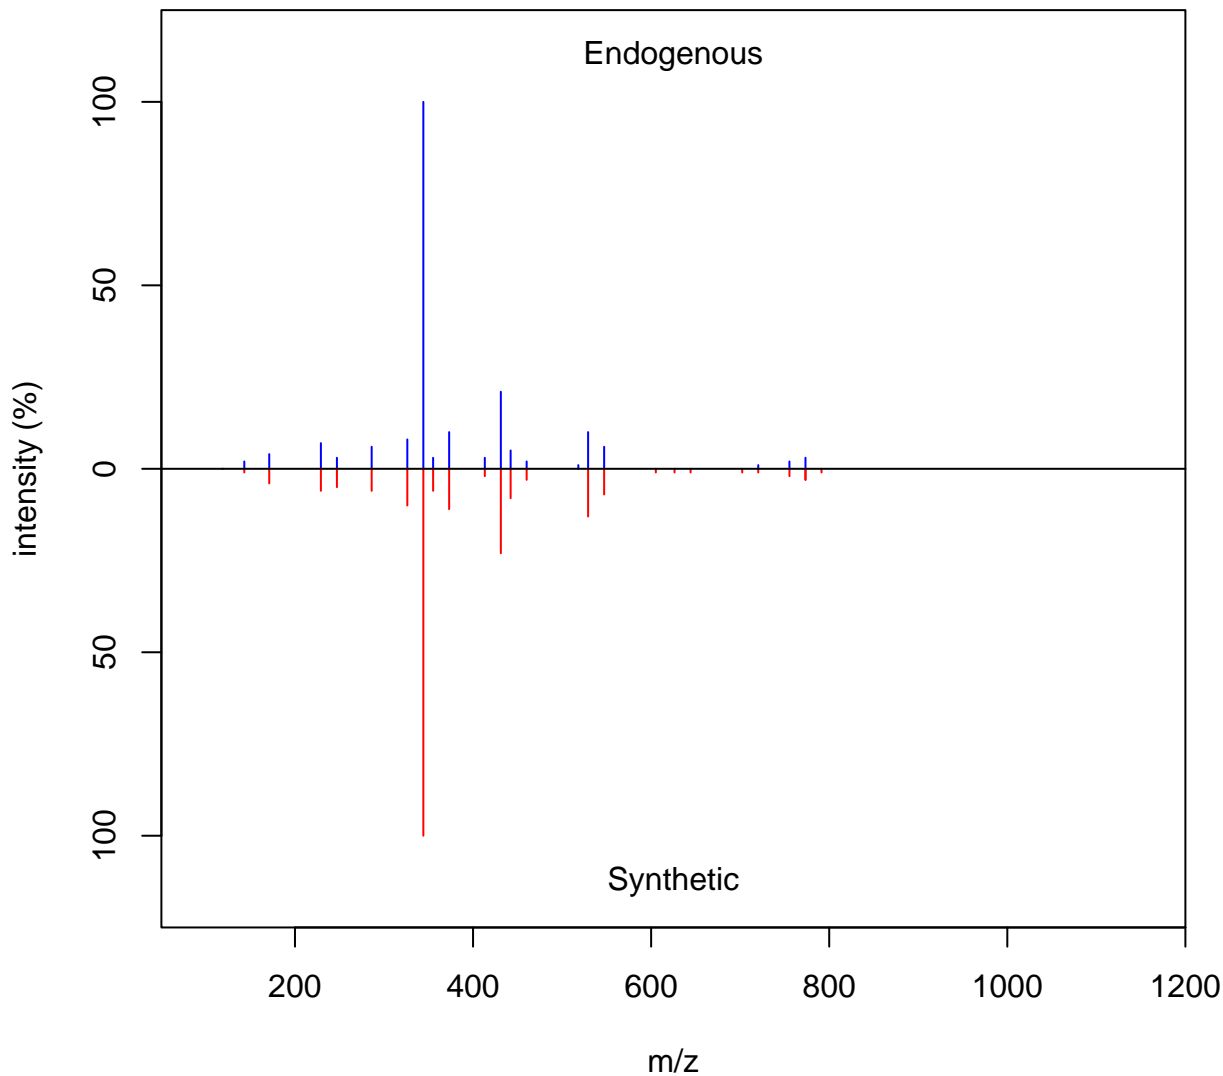

VAFPNEDGSLQK dot-product=1 (r=1 P-value=0)

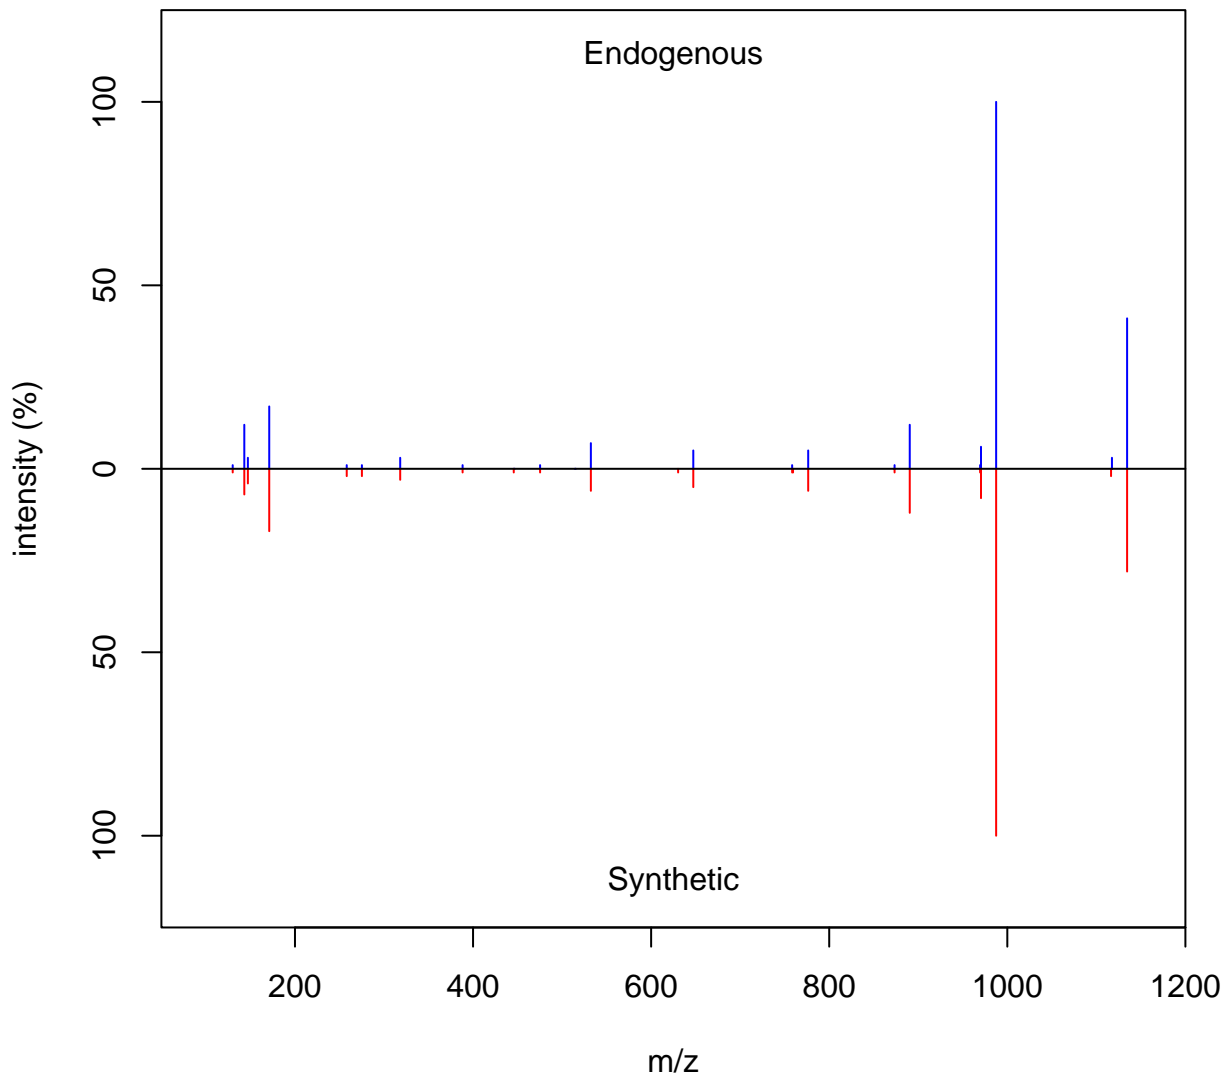

VSAPASGAF dot-product=1 (r=1 P-value=0)

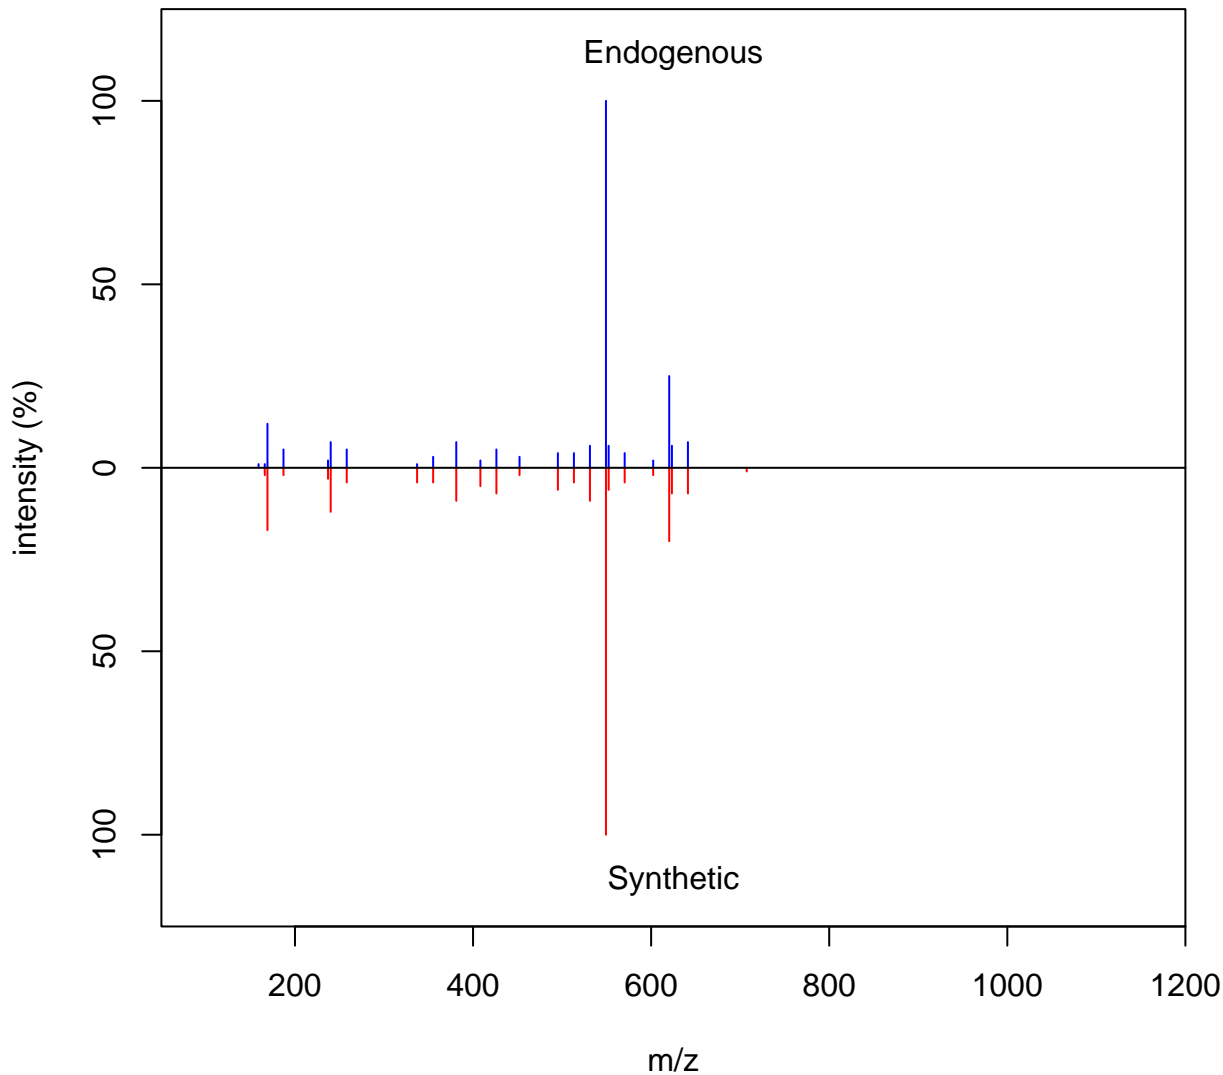

WSDSSGGKGGSY dot-product=1 (r=1 P-value=0)

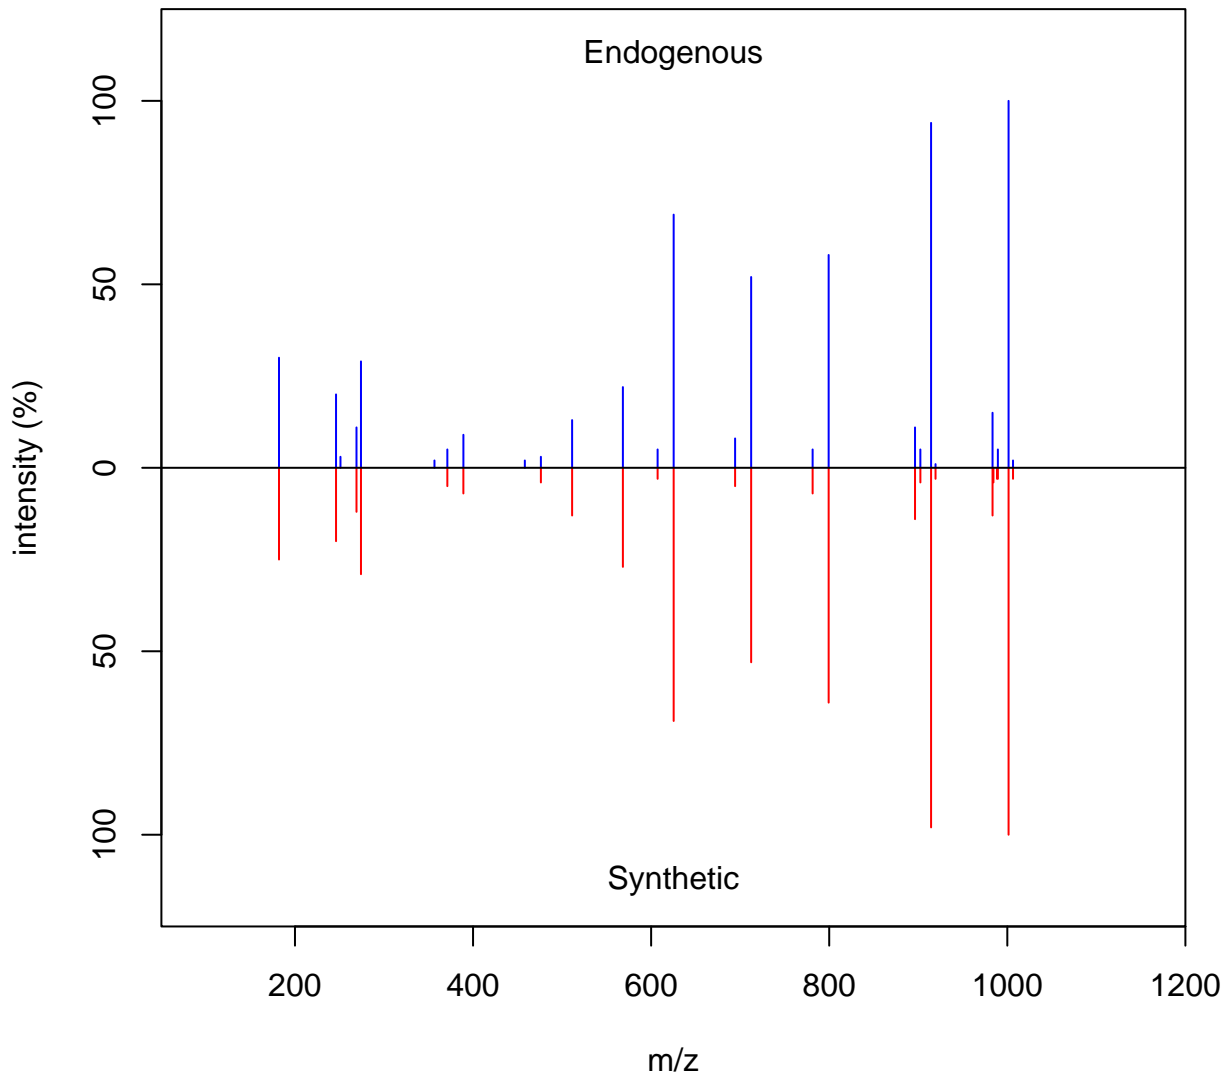

Supplement: mmc15.pdf [file mmc15.pdf]
