# Supplementary material
Source: PubMed Central journal article supplement (PMC10119686)

**HLA-class-I**

**HLA-class-II**

1985

1073

1950

842

1772

816

1106

405

1100

396

711

177

711

177

708

177

652

153

647

152

541

119

442

112

410

105

410

105

145

10

**143**

*Final Number  
Recurrent PTSPs*

**10**

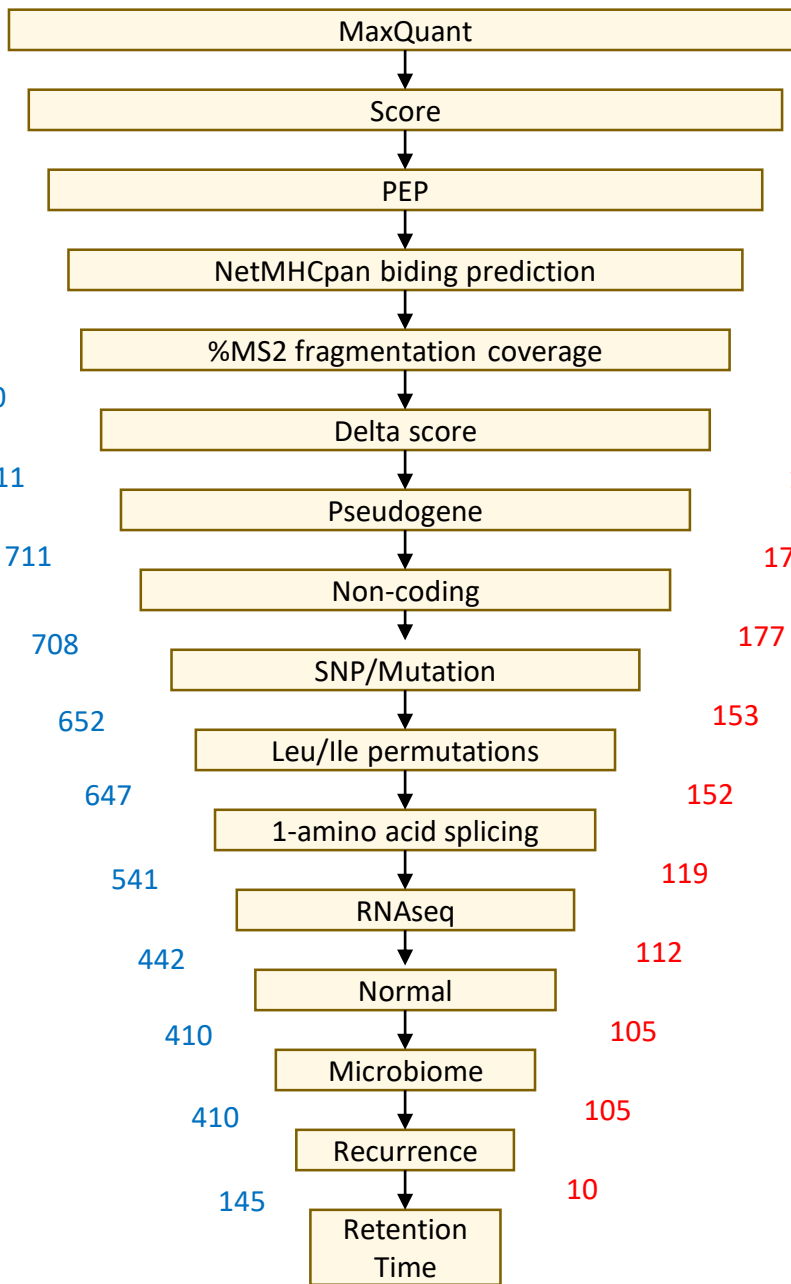

Supplement: mmc12.pdf [file mmc12.pdf]

HLA-Class-I

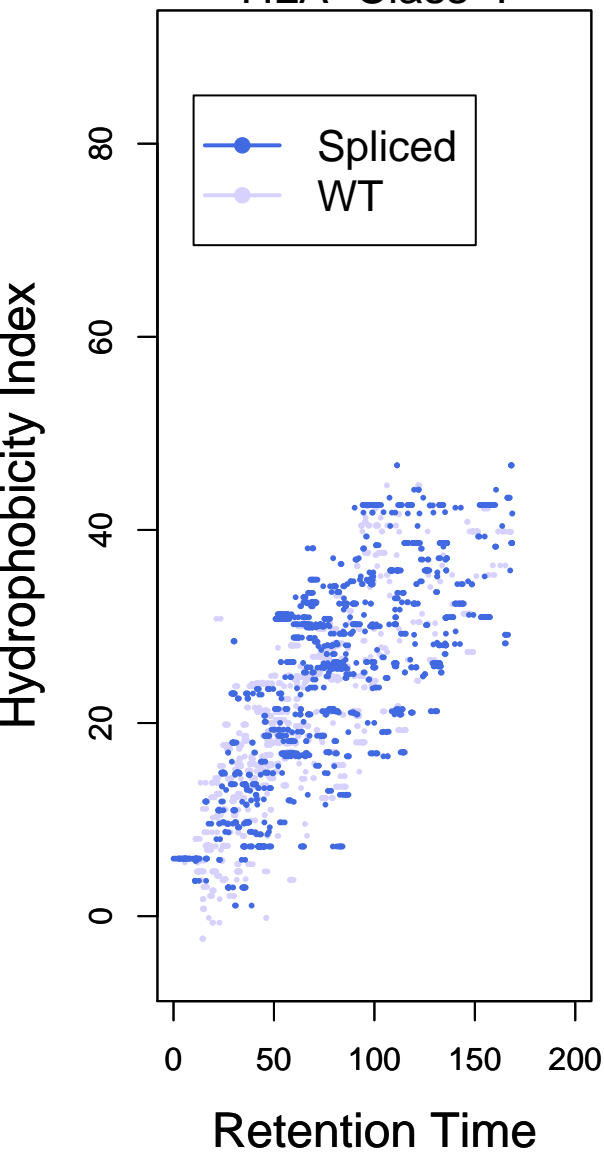

HLA-Class-II

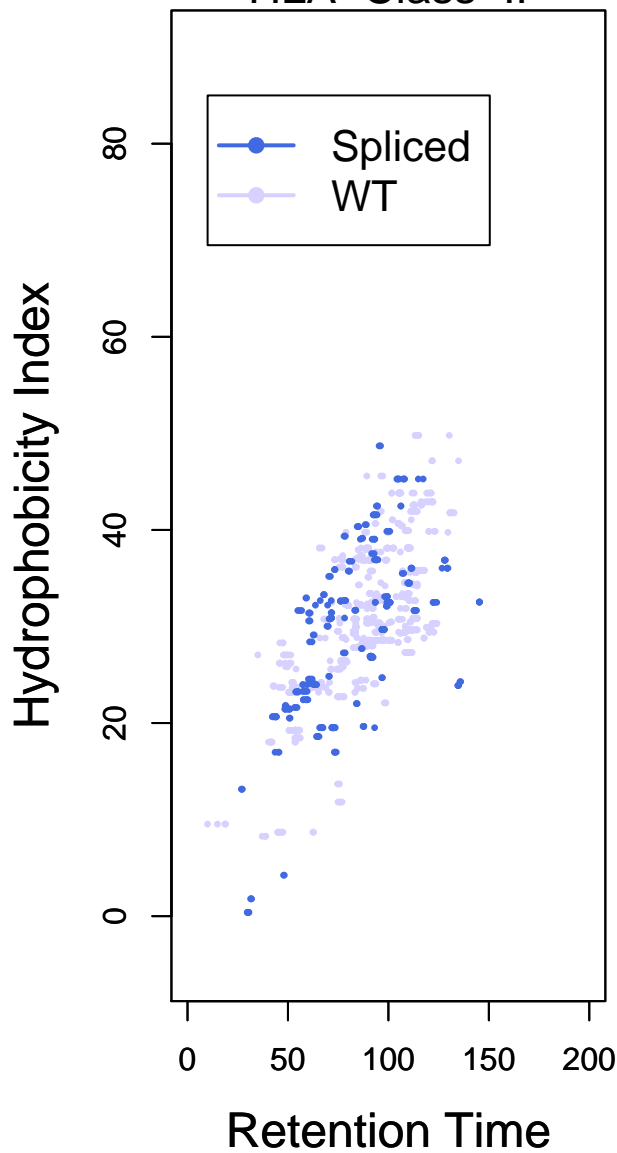

Supplement: mmc13.pdf [file mmc13.pdf]

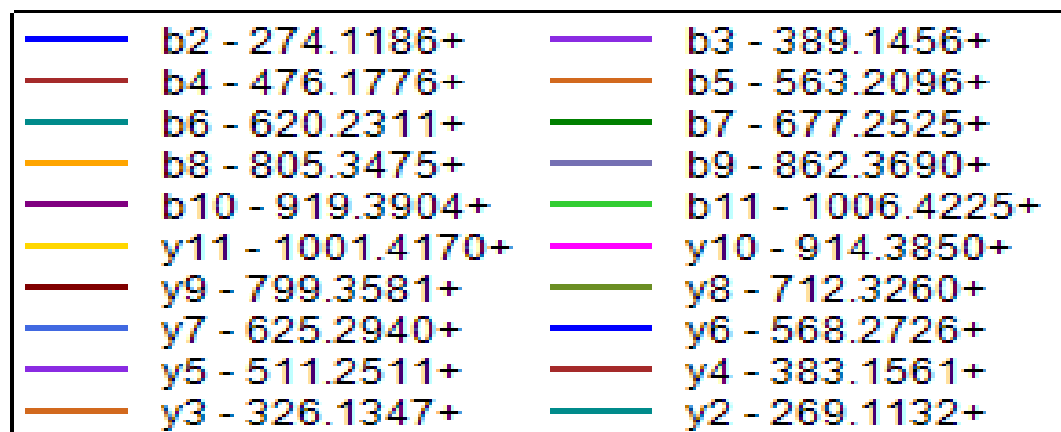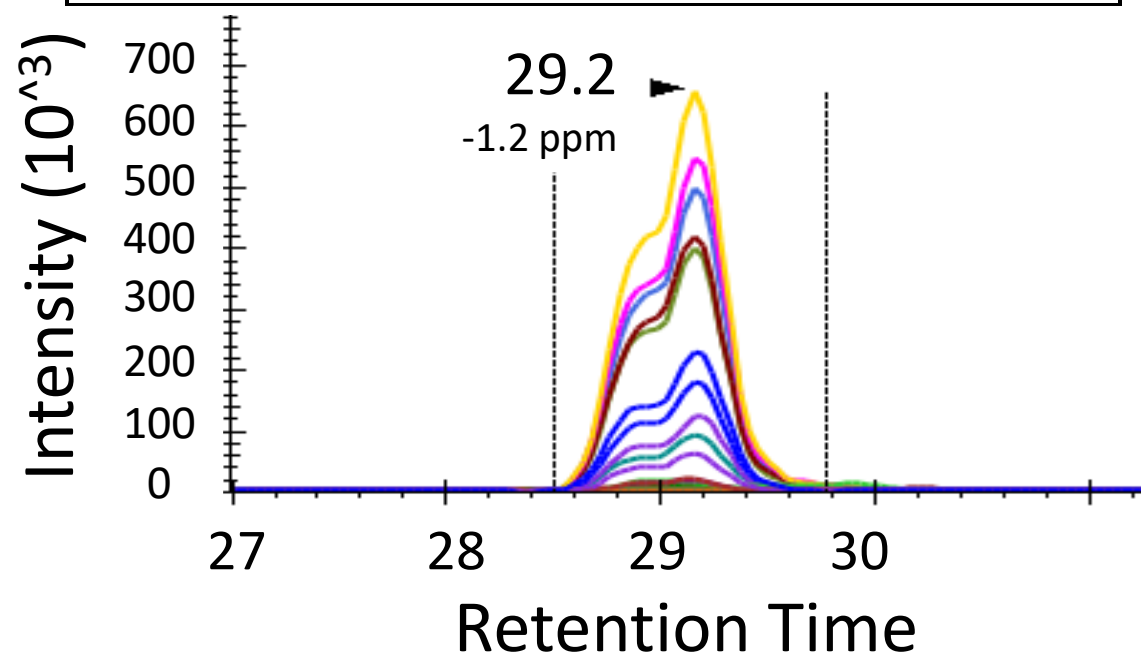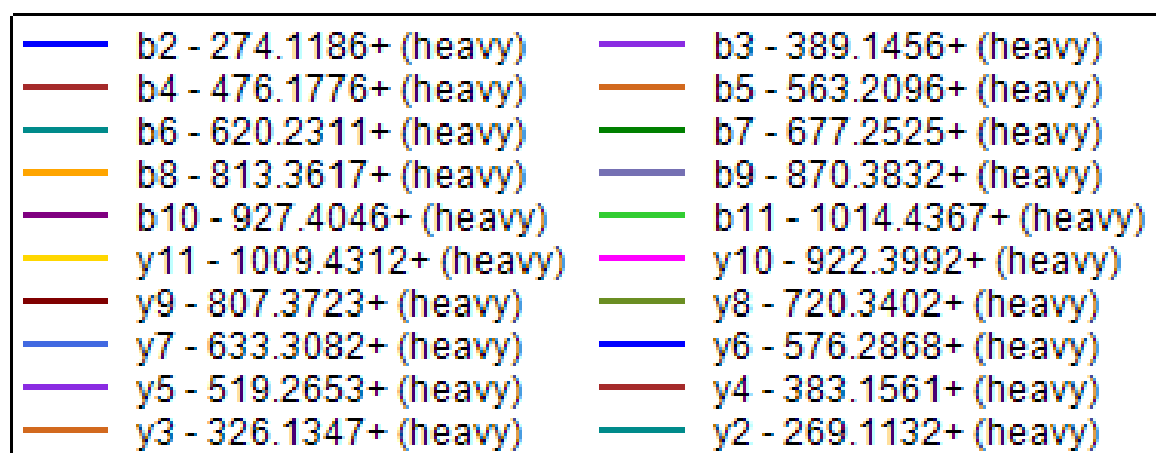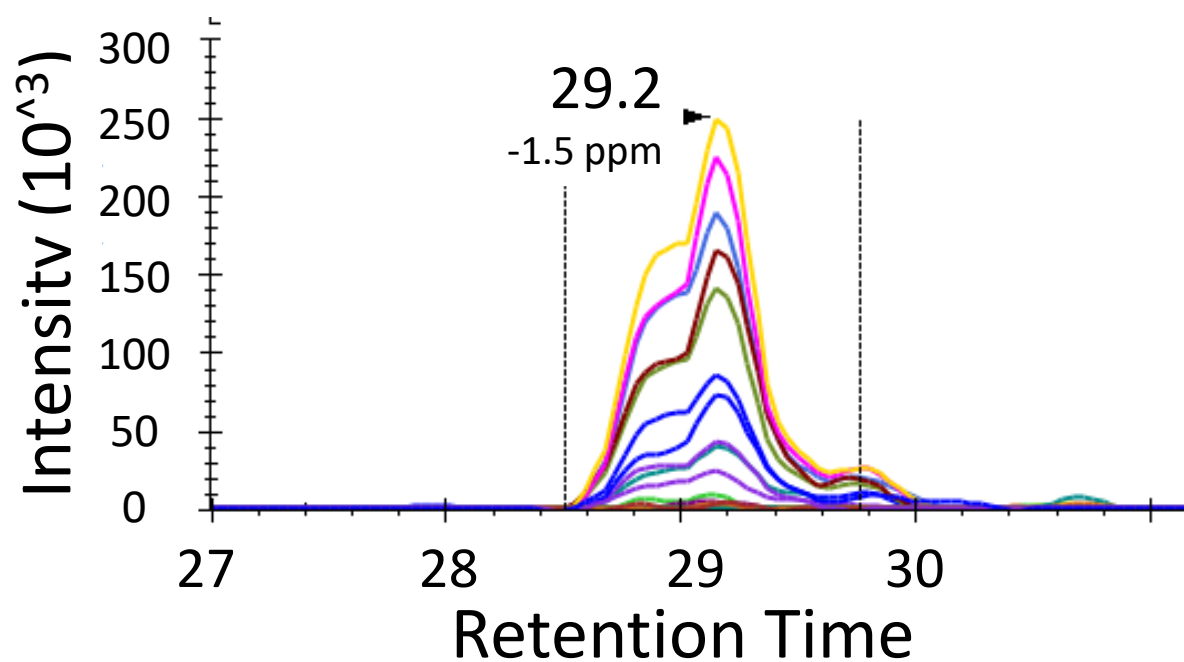

Supplement: mmc14.pdf [file mmc14.pdf]
